# Supplementary material for: Advancing the application, quality and harmonization of implementation science measures
Source: Implement Sci. 2012 Dec 11;7:119. doi: 10.1186/1748-5908-7-119 (PMC3541131; doi:10.1186/1748-5908-7-119)
Supplement: Additional file 2 — D&I GEM Factsheet. This file provides an overview of the Dissemination and Implementation Measures and Methods Initiative and was used for promotional purposes throughout the D&I GEM campaign, including as a component of the campaign toolkit sent to interested users. [file 1748-5908-7-119-S2.pdf]

## What is the D&I Measures and Methods Initiative?

The purpose of the Dissemination and Implementation (D&I) Measures and Methods initiative is to bring together an international community of researchers and practitioners to create a growing and evolving resource for standardized, vetted D&I measures that can lead to comparable datasets and facilitate collaboration and comparison across disciplines and regions.

The D&I Measures and Methods Initiative and resource enables researchers and practitioners to:

- ❖ Identify and define constructs relevant to D&I research and practice;
- ❖ Learn about, comment on, and rate existing measures for D&I;
- ❖ Share new D&I measures;
- ❖ Identify missing D&I measures;
- ❖ Learn about strategies/methods relevant to D&I

### Initiative Components:

- ❖ D&I Grid-Enabled Measures (GEM) Workspace – interactive resources for D&I constructs and measures.
- ❖ D&I Methods Table– listing of data collection, analysis, and design methods relevant to the D&I field.

| Useful Links & Documentation                                                                                             |                 |             |          |
|--------------------------------------------------------------------------------------------------------------------------|-----------------|-------------|----------|
| <a href="#">GEM DI - Acknowledgements</a>                                                                                | application/pdf | Sana Naveed | 3/9/2012 |
| <a href="#">5th Annual NIH Conference on the Science of Dissemination and Implementation: Research at the Crossroads</a> |                 | Sana Naveed | 3/9/2012 |
| <a href="#">Implementation Science - Dissemination and Implementation Measures and Methods Initiative</a>                |                 | Sana Naveed | 3/9/2012 |

## Why should I get involved?

If you are interested in advancing the D&I field, this Initiative is an excellent way to contribute to the field and engage with colleagues. The D&I Measures and Methods Initiative gives you access to D&I constructs, measures, and methods developed by other colleagues and also provides you with a platform to share your own D&I measures.

## How can I get involved?

- ❖ Visit the D&I GEM Workspace ([www.gem-beta.org/GEM-DI](http://www.gem-beta.org/GEM-DI)), click on “Workspaces” to review, comment on, and rate existing D&I measures and constructs, and add additional ones.
- ❖ Review the D&I methods tables (<http://cancercontrol.cancer.gov/IS/dimmi.html>) and join the discussion on the Research to Reality ([researchtoreality.cancer.gov](http://researchtoreality.cancer.gov)) community of practice on these approaches to provide feedback and share your experiences.

### Join the initiative:

<http://cancercontrol.cancer.gov/IS/dimmi.html> or [www.gem-beta.org/GEM-DI](http://www.gem-beta.org/GEM-DI)

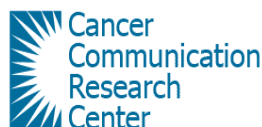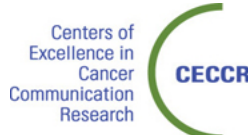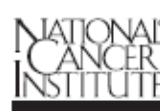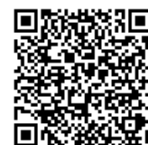

Use the QR code above to learn more
